# Supplementary material for: Modelling of the SDF-1/CXCR4 regulated in vivo homing of therapeutic mesenchymal stem/stromal cells in mice
Source: PeerJ. 2018 Dec 6;6:e6072. doi: 10.7717/peerj.6072 (PMC6286806; doi:10.7717/peerj.6072)
Supplement: Data S1 [file peerj-06-6072-s002.xlsx]

## Sheet: Sheet1
CXCL12 with I/R liver condition
Time [h]	Serum [pg/mL protein]					Liver [pg/mL protein]							Mass [kg]	Fraction of body weight
	1	2	3	Ave	Stdev	1	2	3	Ave	Stdev		Body	0.02	-
0.5	88	72	92	84	10.583	490	475	565	510	48.2183		Liver	0.0011	0.055
4	247	206	177	210	35.171	820	889	814	841	41.6773		Blood	0.00017	0.0085
12	366	367	302	345	37.2424	1903	2250	1808	1987	232.665		Lung	0.00014	0.007
24	124	113	93	110	15.7162	1369	1448	1383	1400	42.1545
48	122	99	82	101	20.0749	780	829	941	850	82.5288
BLOOD												LIVER
MSCs (IC=5e5)	Normal					I/R						MSCs (IC=5e5)	Normal					I/R
Time (h)	1	2	3	Ave	Stdev	1	2	3	Ave	Stdev		Time (h)	1	2	3	Ave	Stdev	1	2	3	Ave	Stdev
0	2.94118e+09	2.94118e+09	2.94118e+09	2.94118e+09	0	2.94118e+09	2.94118e+09	2.94118e+09	2.94118e+09	0		0	0	0	0	0	0	0	0	0	0	0
0.5	480000	490000	560000	510000	43589	600000	621000	549000	590000	37027		0.5	95200000	90000000	98600000	94600000	4.33128e+06	97000000	122000000	84000000	101000000	1.93132e+07
4	73000	79300	-	76150	4454.77	89400	113000	88500	96966.7	13892.6		4	71000000	78000000	91600000	80200000	1.04747e+07	98200000	-	-	98200000	-
12	30000	31500	30600	30700	754.983	51000	53200	45500	49900	3966.11		12	67000000	69400000	49900000	62100000	1.06334e+07	90200000	96600000	94300000	93700000	3.24191e+06
24	17400	15040	10160	14200	3692.37	24500	25700	19100	23100	3515.68		24	36000000	38400000	33900000	36100000	2.25167e+06	74200000	58000000	48400000	60200000	1.30399e+07
48	1544	1325	1058	1309	243.395	4000	4120	2707	3609	783.456		48	9050000	9900000	9910000	9620000	493660	24100000	28700000	22200000	25000000	3.34215e+06
LIVER
24-h hypoxia MSC (IC=5e5)	I/R
Time	1	2	3	Ave	STDEV
0	0	0	0	0	0
0.5	112000000	103000000	88000000	101000000	1.21244e+07
12	101000000	112000000	86100000	99700000	1.29988e+07
24	72600000	78800000	71200000	74200000	4.04475e+06
48	39000000	30000000	27000000	32000000	6.245e+06
BLOOD												LIVER
MSCs (IC=1.5e6)	Normal					IR						MSCs (IC=1.5e6)	Normal					IR
Time (h)	1	2	3	Ave	Stdev	1	2	3	Ave	Stdev		Time (h)	1	2	3	Ave	Stdev	1	2	3	Ave	Stdev
0	8.82353e+09	8.82353e+09	8.82353e+09	8.82353e+09	0	8.82353e+09	8.82353e+09	8.82353e+09	8.82353e+09	0		0	0	0	0	0	0	0	0	0	0	0
0.5	1686000	1550000	1834000	1690000	142042	-	-	1970000	1970000	-		0.5	297700000	225400000	328600000	284000000	5.29659e+07	368000000	-	-	368000000	-
4	-	-	-	-	-	240830	279000	310500	276777	34888.2		4	-	-	-	-	-	276000000	241000000	209000000	242000000	3.35112e+07
12	145000	157000	178000	160000	16703.3	264200	200000	189000	217733	40615.4		12	184500000	121300000	253400000	186000000	6.60705e+07	210000000	208000000	199800000	2.05933e+08	5.40494e+06
24	70000	84000	56000	70000	14000	-	-	-	-	-		24	120700000	110000000	94200000	108000000	1.33315e+07	-	-	-	-	-
48	16400	15900	15100	15800	655.744	27800	33000	35400	32066.7	3885.01		48	30000000	28000000	28580000	28900000	1.02898e+06	62100000	62000000	71000000	6.50333e+07	5.16753e+06
